# Supplementary material for: Effect of activities of daily living disability on the hospitalization of middle-aged and elderly people in China: a cross-sectional study based on CHARLS data
Source: Research Square preprint supplement (doi:10.21203/rs.3.rs-1711063/v1), 2022-06-07
Supplement: Supplementary file 1 [file f84675334c04cd005686bdc9.docx]

Table S1 The original format corresponding to the variables

| **variable** | **Corresponding problem** | **identifier** | **options** | **remark** |
| --- | --- | --- | --- | --- |
| hospitalization in the past year | Have you received inpatient care in the past year? | EE003 | 1.Yes  2.No→Skip to EH001_W4 |  |
| BADL disability | Because of health and memory problems, do you have any difficulty with dressing? Dressing includes taking clothes out from a closet, putting them on, buttoning up, and  fastening a belt. | DB010 | 1.No, I don't have any difficulty→Skip to DB011  2. I have difficulty but can still do it  3. Yes, I have difficulty and need help  4. I can not do it | A patient would be defined as having BADL disability if the patient had difficulty in any of the six items. |
| Because of health and memory problems, do you have any difficulty with bathing or showering? | DB011 | 1.No, I don't have any difficulty→Skip to DB012  2. I have difficulty but can still do it  3. Yes, I have difficulty and need help  4. I can not do it |
| Because of health and memory problems, do you have any difficulty with eating, such as cutting up your food? (Definition: By eating, we mean eating food by oneself when it  is ready) | DB012 | 1.No, I don't have any difficulty→Skip to DB013  2. I have difficulty but can still do it  3. Yes, I have difficulty and need help  4. I can not do it |
| Do you have any difficulty with getting into or out of bed? | DB013 | 1.No, I don't have any difficulty→Skip to DB014  2. I have difficulty but can still do it  3. Yes, I have difficulty and need help  4. I can not do it |
| Because of health and memory problems, do you have any difficulties with using the  toilet, including getting up and down? | DB014 | 1.No, I don't have any difficulty→Skip to DB015  2. I have difficulty but can still do it  3. Yes, I have difficulty and need help  4. I can not do it |
| Because of health and memory problems, do you have any difficulties with controlling urination and defecation? If you use a catheter (conduit) or a pouch by yourself, then you are not considered to have difficulties | DB015 | 1.No, I don't have any difficulty→Skip to DB016  2. I have difficulty but can still do it  3. Yes, I have difficulty and need help  4. I can not do it |
| IADL disability | Because of health and memory problems, do you have any difficulties with doing household chores? (Definition: By doing household chores, we mean house cleaning, doing dishes, making the bed, and arranging the house) | DB016 | 1.No, I don't have any difficulty→Skip to DB017  2. I have difficulty but can still do it  3. Yes, I have difficulty and need help  4. I can not do it | A patient would be defined as having IADL disability if the patient had difficulty in any of the six items. |
| Because of health and memory problems, do you have any difficulties with preparing hot meals? (Definition: By preparing hot meals, we mean preparing ingredients, cooking, and serving food) | DB017 | 1.No, I don't have any difficulty→Skip to DB018  2. I have difficulty but can still do it  3. Yes, I have difficulty and need help  4. I can not do it |
| Because of health and memory problems, do you have any difficulties with shopping for groceries? By shopping, we mean deciding what to buy and paying for it. | DB018 | 1.No, I don't have any difficulty→Skip to DB035  2. I have difficulty but can still do it  3. Yes, I have difficulty and need help  4. I can not do it |
| Because of health and memory problems, do you have any difficulties with making phone calls? | DB035 | 1.No, I don't have any difficulty→Skip to DB020  2. I have difficulty but can still do it  3. Yes, I have difficulty and need help  4. I can not do it |
| Because of health and memory problems, do you have any difficulties with taking medications? By taking medications, we mean taking the right portion of medication right on time. | DB020 | 1.No, I don't have any difficulty→Skip to DB019  2. I have difficulty but can still do it  3. Yes, I have difficulty and need help  4. I can not do it |
| Because of health and memory problems, do you have any difficulties with managing your money, such as paying your bills, keeping track of expenses, or managing assets? | DB019 | 1.No, I don't have any difficulty→Skip to DB019_W2  2. I have difficulty but can still do it  3. Yes, I have difficulty and need help  4. I can not do it |
| ADL disability | The above twelve questions. | DB010-DB020, DB035 | 1.No, I don't have any difficulty  2. I have difficulty but can still do it  3. Yes, I have difficulty and need help  4. I can not do it | A patient would be defined as having ADL disability if the patient had difficulty in any of the twelve items. |
| Gender | Interviewer record the Respondent's gender. | BA000_W2_3 | 1. Male  2. Female |  |
| Age | What's your date of birth on ID card or Household register? | BA004_W3 | 1.(BA004_W3_1) Year (BA004_W3_2) Month (BA004_W3_3) Day  2. Does not have Hukou or ID card→Skip to BA002 BA002  3. Has Hukou or ID card, but refuses to answer the date of birth on ID card or Household register→Skip to BA002 | If his actual date of birth was the same as on ID card, the date of birth on ID card would be used to calculate the age；if not, then the actual date of birth would be used to calculate age. |
| Is your actual date of birth the same as on ID card or Household register? | BA005_W4 | 1. Yes→Skip BA002  2. No |
| What's your actual date of birth? | BA002 | (BA002_1) Year (BA002_2) Month (BA002_3) Day |
| Education | What's the highest level of education your have now (not including adult education)? | BD001_W2_4 | 1. No formal education (illiterate)  2. Did not finish primary school  3. Sishu/home school  4. Elementary school  5. Middle school  6. High school  7. Vocational school  8. Two-/Three-Year College/Associate degree  9. Four-Year College/Bachelor's degree  10. Master's degree  11. Doctoral degree/Ph.D. | The first and second items were classified as illiterate, items 3 and 4 were listed as primary school, Item 5 corresponded to middle school, Item 6 and 7 belonged to the high school, Item 8 and later belonged to College degree or above |
| Marital status | What is your marital status? | BE001 | 1. Married and live with spouse→Skip BE002  2. Married but don't living with spouse temporarily for reasons such as work→Skip BE002  3. Separated, don't live together as a couple anymore  4. Divorced  5. Widowed  6. Never married | The first item was classified as Living with a partner, The second item was classified as not living with a partner, Item 3 and later belonged to no partner |
| Individual annual income | Did you receive any wage and bonus income in the past year? | GA001 | 1. Yes  2. No→Skip to GA003_W4 | Annual income was combined from all income in the past year. According to the size of the amount, annual income was divided into 0CNY, <1000CNY, 1000-10000CNY, 10000-30000CNY  , ≥30000CNY five levels |
| How much did you receive last year? | GA002 | ____Yuan |
| Did you receive any of the following types of income transfers in the past year? (check all that apply) | GA003_W4 | 1. Pensions (including wages from governments, public institutions and firms, supplemental pension of the firms,and income from such programs as rural pension  insurance, Urban residents' pension and commercial pension insurance, new rural social pension insurance) (GA003_W4_1) Yuan  2. Unemployment compensation (GA003_W4_2) Yuan  3. Pension voucher(GA003_W4_3) Yuan  4. Pension subsidy for the oldest old (GA003_W4_4) Yuan  5. Workers' compensation from Industrial Accident Compensation Insurance includes wage-replacement benefits, disability benefits, and survivors' benefits (GA003_W4_5) Yuan  6. Elderly family planning subsidies (GA003_W4_6) Yuan  7. Medical aid (GA003_W4_7)Yuan  8. Other government subsidies, please specify (GA003_W4_8_1), (GA003_W4_8) Yuan  9. Other social income transfer sources, please specify (GA003_W4_9_1), (GA003_W4_9) Yuan  10. None of the above→Skip to GA009_W4 BRANCHPOINT |
| Household registration type | We record your Hukou type was [ZBC004] in [ZIWTime], right? | BC001_W3_1 | 1. Yes→Skip to BC001_W3_3  2. No | Comprehensive three problems, the hukou was divided into agricultural and non-agricultural two types |
| What was your Hukou type in [ZIWTime]? | BC001_W3_2 | 1. Agricultural Hukou  2. Non-agricultural Hukou  3. Unified Residence Hukou  4. Do not have Hukou |
| What was [XChildName]’s hukou type before his/her Unified Residency Hukou? [XChildName] | CB055_W2_1_ | 1. Agriculture Hukou  2. Non-Agriculture Hukou  3. Do not have Hukou  997. Have no idea  999. Refuse to answer this question |
| Social health insurance | Are you the policy holder/primary beneficiary of any of the types of health insurance listed below? (circle all that apply) | EA001_W4 | 1. Urban employee medical insurance (yi-bao)  2. Urban and rural resident medical insurance (integrated urban resident medical insurance and new rural cooperative medical insurance)  3. Urban resident medical insurance  4. New rural cooperative medical insurance (he-zuo-yi-liao)  5. Government medical insurance  6. Medical aid  7. Private medical insurance: purchased by work unit  8. Private medical insurance: purchased by individual  9. Urban non-employed persons's health insurance  10. Long-term care insurance  11. Other medical insurance, specify(EA001_1 )  12. No insurance→Skip to EA009 | The first four options are all national basic medical insurance, and can only have one, the fifth option and later was classified as the other |
| Self-rated health level | Next, I have some questions about your health. Would you say your health is very good, good, fair, poor or very poor? | DA002 | 1. Very good  2. Good  3. Fair  4. Poor  5. Very poor  997 Don't know |  |
| The number of chronic diseases | Have you been diagnosed with Hypertension by a doctor? | DA007_1_ | 1. Yes  2. No | After adding up the number of diseases of category 14 chronic diseases, they were classified by 0, 1, 2, 3,≥4. |
| Have you been diagnosed with Dyslipidemia (elevation of low density lipoprotein, triglycerides (TGs),and total cholesterol, or a low high density lipoprotein level) by a doctor? | DA007_2_ | 1. Yes  2. No |
| Have you been diagnosed with Diabetes or high blood sugar by a doctor? | DA007_3_ | 1. Yes  2. No |
| Have you been diagnosed with Cancer or malignant tumor (excluding minor skin cancers) by a doctor? | DA007_4_ | 1. Yes  2. No |
| Have you been diagnosed with Chronic lung diseases, such as chronic bronchitis, emphysema (excluding tumors, or cancer) by a doctor? | DA007_5_ | 1. Yes  2. No |
| Have you been diagnosed with Liver disease (except fatty liver, tumors, and cancer) by a doctor? | DA007_6_ | 1. Yes  2. No |
| Have you been diagnosed with Heart attack, coronary heart disease, angina, congestive heart failure, or other heart problems by a doctor? | DA007_7_ | 1. Yes  2. No |
| Have you been diagnosed with Stroke by a doctor? | DA007_8_ | 1. Yes  2. No |
| Have you been diagnosed with Kidney disease (except for tumor or cancer) by a doctor? | DA007_9_ | 1. Yes  2. No |
| Have you been diagnosed with Stomach or other digestive diseases (except for tumor or cancer) by a doctor? | DA007_10_ | 1. Yes  2. No |
| Have you been diagnosed with Emotional, nervous, or psychiatric problems by a doctor? | DA007_11_ | 1. Yes  2. No |
| Have you been diagnosed with Memory-related disease (such as dementia, brain atrophy, and Parkinson's disease) by a doctor? | DA007_12_ | 1. Yes  2. No |
| Have you been diagnosed with Arthritis or rheumatism by a doctor? | DA007_13_ | 1. Yes  2. No |
| Have you been diagnosed with Asthma by a doctor? | DA007_14_ | 1. Yes  2. No |
| Strength of physical Activity | Please recall the [preload the type of physical activity] that you have taken part in for at least 10 minutes every time in a week. Do you usually take this type of activity for at least 10 minutes every week?(Ask DA051 for each type of physical activity, including: Vigorous-intensity activity, Moderate activity, Mild activities) | DA051 | 1. Yes  2. No→Start the next type of physical activity or skip to DA056 | Vigorous-intensity activity, moderate activity and mild activities corresponded to high, medium and low strength respectively. None of the three, it was classified as No |
| Smoke | Have you ever chewed tobacco, smoked a pipe, smoked self-rolled cigarettes, or smoked cigarettes/cigars? | DA059 | 1. Yes  2. No→Skip to DA067 | Smoking was defined as whether they was still smoking. |
| Do you still have the habit or have you totally quit? | DA061 | 1. Still have→Skip to DA060  2. Quit→Skip to DA060 |
| Drink | Did you drink any alcoholic beverages, such as beer, wine, or liquor in the past year? How often? | DA067 | 1. Drink more than once a month  2. Drink but less than once a month→Skip to procedure before DA069  3. None of these→Skip to procedure before DA069 | Drinking was defined as whether they had drank in the past year. |

Table S2 Results of multivariate logistic regression for factors affecting hospitalization

| Variable | OR | P | 95%CI | |
| --- | --- | --- | --- | --- |
| ADL disability |  |  |  |  |
| No | 1 |  |  |  |
| Yes | 1.413 | <0.001* | 1.281 | 1.559 |
| Gender |  |  |  |  |
| Male | 1 |  |  |  |
| Female | 0.634 | <0.001* | 0.570 | 0.707 |
| Age |  |  |  |  |
| 45～59 | 1 |  |  |  |
| 60～75 | 1.222 | <0.001* | 1.102 | 1.355 |
| ≥75 | 1.738 | <0.001* | 1.497 | 2.017 |
| Household registration type |  |  |  |  |
| Agricultural Hukou | 1 |  |  |  |
| Non-agricultural Hukou | 1.372 | <0.001* | 1.168 | 1.612 |
| Education |  |  |  |  |
| Illiterate | 1 |  |  |  |
| Primary school | 1.084 | 0.159 | 0.969 | 1.213 |
| Middle school | 1.030 | 0.642 | 0.908 | 1.169 |
| High school | 1.064 | 0.471 | 0.899 | 1.259 |
| College degree or above | 1.021 | 0.904 | 0.728 | 1.432 |
| Marital status |  |  |  |  |
| Living with a partner | 1 |  |  |  |
| Not living with a partner | 0.605 | <0.001* | 0.486 | 0.753 |
| No partner | 1.029 | 0.641 | 0.913 | 1.160 |
| Individual annual income |  |  |  |  |
| <1000CNY | 1 |  |  |  |
| 1000-10000CNY | 0.949 | 0.343 | 0.852 | 1.057 |
| 10000-30000CNY | 0.911 | 0.188 | 0.792 | 1.047 |
| ≥30000CNY | 0.776 | 0.005* | 0.651 | 0.926 |
| Social health insurance |  |  |  |  |
| Other | 1 |  |  |  |
| Urban employee medical insurance | 2.062 | <0.001* | 1.591 | 2.672 |
| Urban and rural resident medical insurance | 1.585 | <0.001* | 1.234 | 2.036 |
| Urban resident medical insurance | 1.525 | 0.007* | 1.121 | 2.075 |
| New rural cooperative medical insurance | 1.655 | <0.001* | 1.316 | 2.081 |
| Self-rated health level |  |  |  |  |
| Very good | 1 |  |  |  |
| Good | 1.247 | 0.070 | 0.982 | 1.584 |
| Fair | 2.026 | <0.001* | 1.668 | 2.462 |
| Poor | 4.044 | <0.001* | 3.297 | 4.961 |
| Very poor | 5.593 | <0.001* | 4.432 | 7.058 |
| The number of chronic diseases |  |  |  |  |
| 0 | 1 |  |  |  |
| 1 | 1.690 | <0.001* | 1.531 | 1.866 |
| 2 | 2.262 | <0.001* | 1.992 | 2.568 |
| 3 | 2.183 | <0.001* | 1.816 | 2.623 |
| ≥4 | 2.971 | <0.001* | 2.394 | 3.686 |
| Smoke |  |  |  |  |
| No | 1 |  |  |  |
| Yes | 0.638 | <0.001* | 0.569 | 0.717 |
| Drink |  |  |  |  |
| No | 1 |  |  |  |
| Yes | 0.743 | <0.001* | 0.670 | 0.825 |
| Strength of physical Activity |  |  |  |  |
| No | 1 |  |  |  |
| Low strength | 0.993 | 0.921 | 0.857 | 1.150 |
| Medium strength | 0.897 | 0.164 | 0.771 | 1.045 |
| High strength | 0.804 | 0.006* | 0.688 | 0.938 |
